# Supplementary material for: Phylogenetic Analysis of the Teneurins: Conserved Features and Premetazoan Ancestry
Source: PubMed Central journal article supplement — Mol Biol Evol. 2011 Oct 31;29(3):1019–29. doi: 10.1093/molbev/msr271 (PMC3278476; doi:10.1093/molbev/msr271), 2011-10-31
Supplement: supp_msr271_MSR271_Supplementary_table_S3_revised.pdf [file supp_msr271_MSR271_Supplementary_table_S3_revised.pdf]

Supplementary table S3. Analysis of selected teneurins

| Species (common name)                    | Protein Name | RefSeq/ID    | Total aa | ICD aa | NLS (score)* | Furin cleavage (score)**                      |
|------------------------------------------|--------------|--------------|----------|--------|--------------|-----------------------------------------------|
| <i>H. sapiens</i> (human)                | Teneurin-1   | NP_055068    | 2725     | 317    | 2 (4.8, 6.0) | aa2618 (0.78)                                 |
|                                          | Teneurin-2   | Q9NT68       | 2774     | 374    | 0            | aa528 (0.65), aa2663 (0.57)                   |
|                                          | Teneurin-3   | NP_001073946 | 2699     | 308    | 1 (2.9)      | aa473 (0.81), aa2592 (0.67)                   |
|                                          | Teneurin-4   | NP_001092286 | 2769     | 340    | 1 (4.2)      | aa2662 (0.73)                                 |
| <i>M. musculus</i> (mouse)               | Teneurin-1   | NP_035985    | 2731     | 317    | 2 (5.0, 5.0) | aa2624 (0.78)                                 |
|                                          | Teneurin-2   | NP_035986    | 2764     | 374    | 0            | aa528 (0.65), aa 2654 (0.57)                  |
|                                          | Teneurin-3   | NP_035987    | 2715     | 308    | 1 (2.9)      | aa473 (0.81), aa2608 (0.67)                   |
|                                          | Teneurin-4   | NP_035988    | 2796     | 365    | 0            | aa2689 (0.73)                                 |
| <i>G.gallus</i> (chicken)                | Teneurin-1   | NP_990193    | 2705     | 298    | 2 (4.8, 9.0) | aa2598 (0.79)                                 |
|                                          | Teneurin-2   | NP_989428    | 2802     | 402    | 1 (2.7)      | aa556 (0.65), aa2692 (0.62)                   |
|                                          | Teneurin-3   | HE578904     | 2712     | 308    | 1 (3.0)      | aa470 (0.76), aa2605 (0.67)                   |
|                                          | Teneurin-4   | XM_425655    | 2852     | 376    | 1 (3.7)      | aa2698 (0.69)                                 |
| <i>D. rerio</i> (zebrafish)              | Teneurin-1   | XP_691552    | 2721     | 297    | 0            | 0                                             |
|                                          | Teneurin-2A  | XP_697293†   | 2710     | 324    | 0            | aa484 (0.71), aa1588 (0.60),<br>aa2606 (0.79) |
|                                          | Teneurin-2B  | XP_691651    | 2688     | 307    | 0            | aa461 (0.70), aa2578 (0.77)                   |
|                                          | Teneurin-3   | Q9W7R4‡      | 2760     | 371    | 1 (2.8)      | aa533 (0.83), aa2653 (0.70)                   |
|                                          | Teneurin-4   | NP_571044    | 2824     | 411    | 1 (3.2)      | aa2717 (0.62)                                 |
| <i>C. intestinalis</i> (sea squirt)      | Teneurin     | XR_052936    | 3111     | 649    | 2 (2.6, 3.5) | aa737(0.83), aa1530 (0.67),<br>aa2913 (0.73)  |
| <i>B. floridae</i> (amphioxus)           | Teneurin     | XP_002206906 | 2566     | 317    | 0            | aa475 (0.58), aa832 (0.80),<br>aa2565 (0.60)  |
| <i>S. purpuratus</i> (purple sea urchin) | Teneurin     | XP_001180001 | 2834     | 484    | 0            | aa640 (0.89), aa677 (0.88),<br>aa1968 (0.58)  |
| <i>C. elegans</i> (roundworm)            | Ten-1L       | NP_001022723 | 2684     | 216    | 2 (3.8, 2.5) | aa361 (0.81)                                  |
| <i>D. melanogaster</i> (fruit fly)       | Ten-m/Odz    | NP_524215    | 2997     | 226    | 1 (2.8)      | aa2975 (0.59)                                 |
|                                          | Ten-a        | Q9VYN8       | 3004     | 165    | 2 (4.3, 3.7) | aa431 (0.66), aa503 (0.68),<br>aa2986 (0.87)  |
| <i>S. mansoni</i> (fluke)                | Teneurin     | XP_002576635 | 2950     | 137    | 0            | aa276 (0.74), aa1625 (0.57)                   |
| <i>M. brevicollis</i> (choanoflagellate) | Teneurin     | XP_001749414 | 2699     | 159    | 1 (3.1)      | 0                                             |

\*Nuclear localization signal, as predicted by NLS Mapper (cutoff score = 2.5)

\*\*Furin-specific cleavage predicted by ProP 1.0 (cutoff score = 0.55)

†plus EST CR929815 plus novel predicted ORF (see Supplemental Table III)

‡plus EST BC122397
